# Supplementary material
Source: Springer Nature journal article supplement (https://www.springermedizin.de/resource/supplementary/12937_2006_109_MOESM2_ESM.pdf/25654416)

### a) WAT

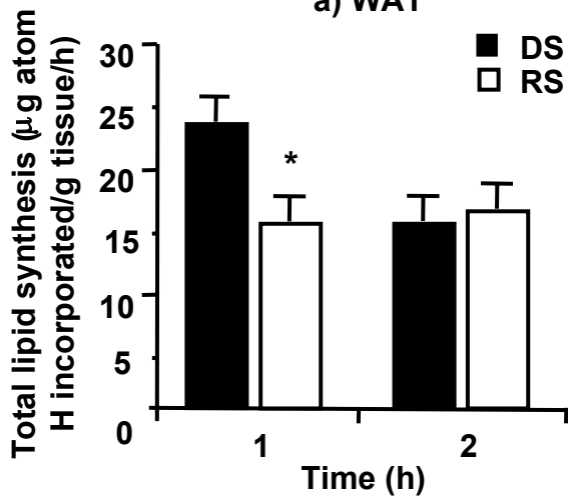

### b) Liver

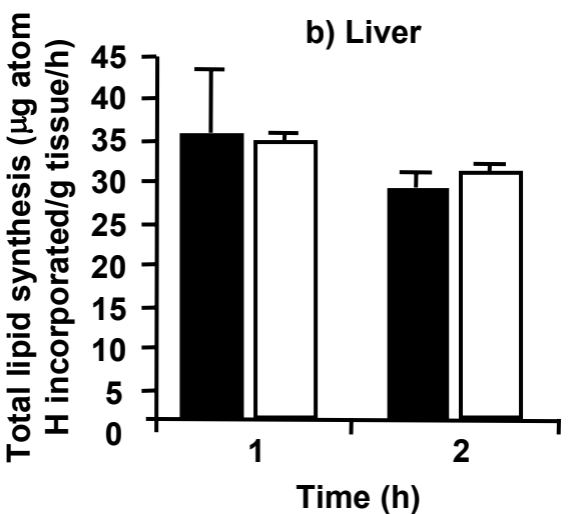

### c) Gastrocnemius muscle

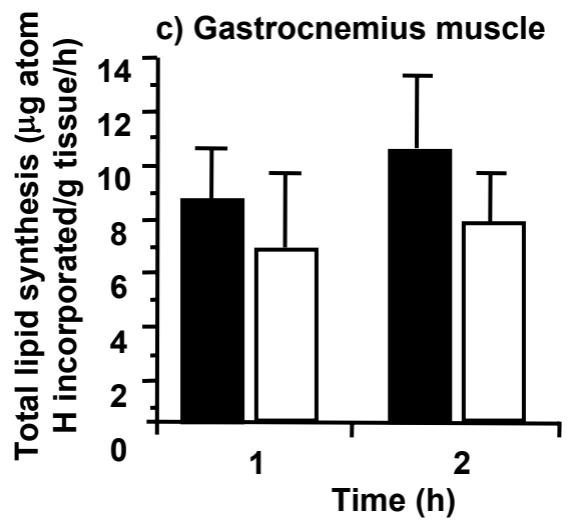

Supplement: MOESM2 [file 25654416]
